# Supplementary material
Source: publisher figshare collection journal article supplement (https://karger.figshare.com/ndownloader/files/38287128)
Supplement: Supplementary file 1 [file 38287128]

Supplementary Table 4. Correlation of the cytomorphologic parameters of SurePathTM and WellPrep® by Pearson’s *x2* test (n=205)

| Cytomorphologic parameters |  | SurePathTM (%) | WellPrep® (%) | *P* value |
| --- | --- | --- | --- | --- |
| Cell preservation | Less than 75% | 0 (0) | 1 (0.5) | NA |
|  | More than 75% | 205 (100) | 204 (99.5) |  |
| Obscuring | Yes | 0 (0) | 2 (1.0) | NA |
|  | No | 205 (100) | 203 (99.0) |  |
| Cell distribution | Condensed | 1 (0.5) | 75 (36.6) | 1.000* |
|  | Even | 204 (99.5) | 130 (63.4) |  |
| Inflammatory cells | Absent / A few | 93 (45.4) | 68 (33.2) | **<0.001** |
|  | Many | 112 (54.6) | 137 (66.8) |  |
| Large cell clusters | Absent | 6 (2.9) | 33 (16.1) | 0.248* |
|  | Present | 199 (97.1) | 172 (83.9) |  |
| 3-Dimensional configuration | Absent | 175 (85.4) | 187 (91.2) | **<0.001*** |
|  | Present | 30 (14.6) | 18 (8.8) |  |
| Overlapping | Absent | 171 (83.4) | 177 (86.3) | **<0.001*** |
|  | Present | 34 (16.6) | 28 (13.7) |  |
| Atypical single cells | Absent | 155 (75.6) | 158 (77.1) | **<0.001** |
|  | Present | 50 (24.4) | 47 (22.9) |  |
| Cytoplasmic membrane | Indistinct (frayed) | 0 (0) | 2 (1.0) | NA |
|  | Distinct | 205 (100) | 203 (99.0) |  |
| Cytoplasmic density | Low | 0 (0) | 27 (13.2) | NA |
|  | High | 205 (100) | 178 (86.8) |  |
| Perinuclear clearing | Absent | 140 (68.3) | 160 (78.0) | **<0.001** |
|  | Present | 65 (31.7) | 45 (22.0) |  |
| Multinucleation | Absent | 103 (50.2) | 127 (62.0) | **<0.001** |
|  | Present | 102 (49.8) | 78 (38.0) |  |
| Nuclear enlargement | Absent | 99 (48.3) | 108 (52.7) | **<0.001** |
|  | Present | 106 (51.7) | 97 (47.3) |  |
| Hyperchromatic nuclei | Absent | 156 (76.1) | 159 (77.6) | **<0.001** |
|  | Present | 49 (23.9) | 46 (22.4) |  |
| Nuclear size variation | Absent | 141 (68.8) | 145 (70.7) | **<0.001** |
|  | Present | 64 (31.2) | 60 (29.3) |  |
| Nuclear membrane irregularity | Absent | 131 (63.9) | 135 (65.9) | **<0.001** |
|  | Present | 74 (36.1) | 70 (34.1) |  |
| High N/C ratio | Absent | 171 (83.4) | 171 (83.4) | **<0.001** |
|  | Present | 34 (16.6) | 34 (16.6) |  |
| Coarse chromatin | Absent | 181 (88.3) | 175 (85.4) | **<0.001*** |
|  | Present | 24 (11.7) | 30 (14.6) |  |
| Mitoses | Absent | 203 (99.0) | 195 (95.1) | **0.002*** |
|  | Present | 2 (1.0) | 10 (4.9) |  |
| Prominent nucleoli | Absent | 200 (97.6) | 195 (95.1) | **<0.001*** |
|  | Present | 5 (2.4) | 10 (4.9) |  |

Abbreviations: N/C, Nuclear/Cytoplasmic. *Fisher’s exact test was used.
